# Supplementary material for: An advanced medium-entropy substituted tunnel-type Na0.44MnO2cathode for high-performance sodium-ion batteries
Source: Royal Society of Chemistry journal article supplement (doi:10.1039/d2qi01567f), 2022-12-21
Supplement: d2qi01567f1.pdf [file d2qi01567f1.pdf]

## Electronic Supplementary Information

### Experimental section

**Preparation of materials:** The medium-entropy tunnel-type (T-type)  $\text{Na}_{0.44}\text{MnO}_2$  samples were synthesized by a simple solid-state reaction method. Stoichiometric  $\text{Na}_2\text{CO}_3$  (5 wt% excess to compensate for sodium evaporation),  $\text{MnCO}_3$ ,  $\text{Al}(\text{OH})_3$ ,  $\text{TiO}_2$ , and  $\text{CoO}$  were balled in ethanol for half six hours. Then the obtained precursors were sintered at 900 °C for 12 h under the air atmosphere in a muffle furnace. In comparison, the T-type  $\text{Na}_{0.44}\text{MnO}_2$  materials were synthesized by a similar route without adding Al and Ti and Co sources. For convenience,  $\text{Na}_{0.44}\text{MnO}_2$ ,  $\text{Na}_{0.44}\text{Mn}_{0.97}\text{Al}_{0.01}\text{Ti}_{0.01}\text{Co}_{0.01}\text{O}_2$ ,  $\text{Na}_{0.44}\text{Mn}_{0.94}\text{Al}_{0.02}\text{Ti}_{0.02}\text{Co}_{0.02}\text{O}_2$ ,  $\text{Na}_{0.44}\text{Mn}_{0.91}\text{Al}_{0.03}\text{Ti}_{0.03}\text{Co}_{0.03}\text{O}_2$  are referred as NMO, NMO-1, NMO-2, and NMO-3, respectively.

**Materials Characterization:** The structures of the samples were measured by X-ray diffraction (XRD) on a Philips X' Pert Super diffractometer with  $\text{Cu K}\alpha$  ( $\lambda=1.54182$  Å), The morphologies of the samples were characterized on scanning electron microscopy (SEM, JEOL-JSM-6700F), transmission electron microscopy (TEM, Hitachi H7650) and high-resolution transmission electron microscopy (HR-TEM, JEM-2100F) with an energy-dispersive X-ray spectrometer (EDX). X-ray photoelectron spectroscopy (XPS) was collected on an ESCALAB 250 X-ray photoelectron spectrometer (Perkin-Elmer) was occupied to perform the distribution of elements on the surface of materials. Inductively coupled plasma optical emission spectroscopy was used to estimate the Na/M (M = Mn, Al, Ti, Co) ratios in materials (ICP-OES).

**Electrochemical measurement:** Using N-methyl-2-pyrrolidone (NMP) as a solvent, Previously. The electrodes had been prepared by mixing 70 wt % active materials, 20 wt % Super P, and 10 wt % polyvinylidene fluoride (PVDF) binder to form a slurry, which was then coated on aluminum foil. The aluminum foil was then dried overnight in a vacuum oven at 100 °C for 12 h. Following that, the working electrodes were removed and pressed at a pressure of 20 MPa. The electrolyte used was 1.0 mol  $\text{L}^{-1}$   $\text{NaClO}_4$  in an ethylene carbonate (EC)–diethyl carbonate (DEC) solution (1:1 v/v) with 5 vol % of fluoroethylene carbonate (FEC), and glass fiber membrane (Whatman, GF/D) as separator were assembled to form 2032-coin cells. Sodium foil was cut from a sodium bulk stored in mineral oil and used as the counter electrode. In an argon-filled glove box, the cells were assembled. The galvanostatic cycling test was measured by the Land CT2001A battery test system between 2.0 and 4.0 V at 25 °C. Using a CHI 660b electrochemistry workstation between 4.0 and 2.0 V, cyclic voltammetry (CV) at a scan rate of 0.1 to 1  $\text{mV s}^{-1}$  and electrochemical impedance spectroscopy (EIS) from 100 kHz to 100 MHz were performed. The diffusion coefficient of  $\text{Na}^+$  was studied using the galvanostatic intermittent titration technique (GITT) and EIS. For the GITT measurement, the cells were charged and discharged at 0.1 C for 300 s followed by open-circuit relaxation for 1 h. The procedure was maintained until the voltage reached 4.0 or 2.0 V.

**Theoretical Calculations:** Spin-polarized calculations are performed in the framework of the density functional theory (DFT) with the projector augmented plane-wave method, as implemented in the Vienna ab initio simulation package. The generalized gradient approximation proposed by Perdew, Burke, and Ernzerhof is selected for the exchange-correlation potential. The effects due to the localization of the d-orbital electrons of TM-ions were taken into account with the GGA + U approach. The effective U values were set to 3.9 eV Ru. The cut-off energy for plane wave is set to 520 eV. The energy criterion is set to  $10^{-6}$  eV in iterative solution of the Kohn-Sham equation. The Gamma k-point mesh was sampled with a separation of about  $0.03 \text{ \AA}^{-1}$  in the Brillouin zone. All the structures are relaxed until the residual forces on the atoms have declined to less than  $0.03 \text{ eV/\AA}$ .

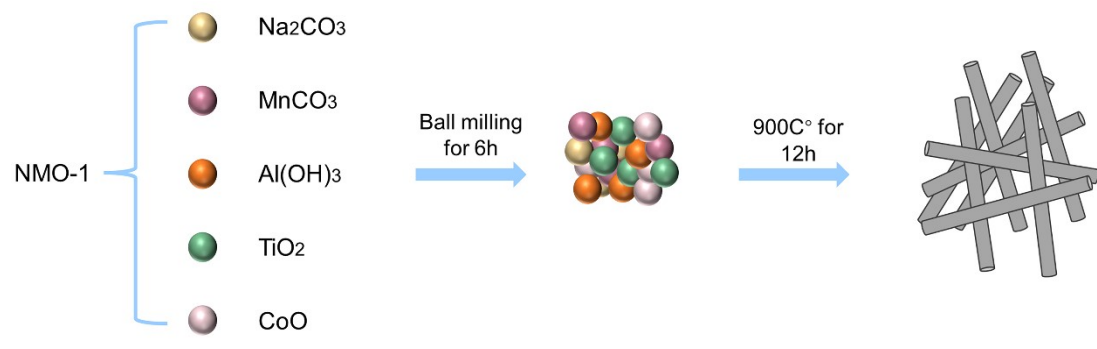

**Figure S1:** Preparation method of NMO-1.

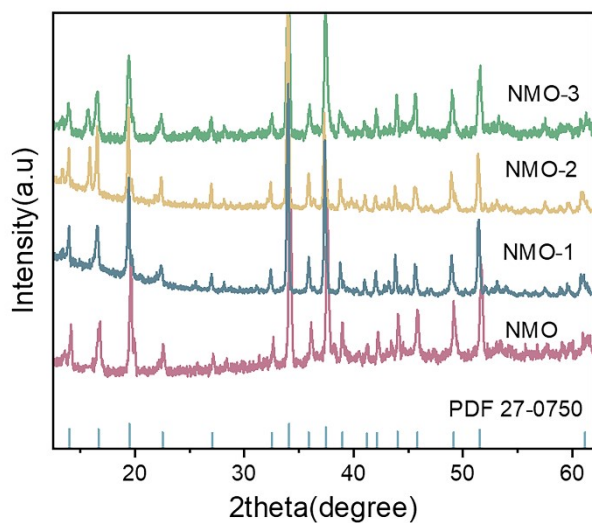

**Figure S2:** XRD patterns of  $\text{Na}_{0.44}\text{MnO}_2$  (NMO),  $\text{Na}_{0.44}\text{Mn}_{0.97}(\text{Al,Ti,Co})_{0.01}\text{O}_2$  (NMO-1),  $\text{Na}_{0.44}\text{Mn}_{0.94}(\text{Al,Ti,Co})_{0.02}\text{O}_2$  (NMO-2),  $\text{Na}_{0.44}\text{Mn}_{0.91}(\text{Al,Ti,Co})_{0.03}\text{O}_2$  (NMO-3).

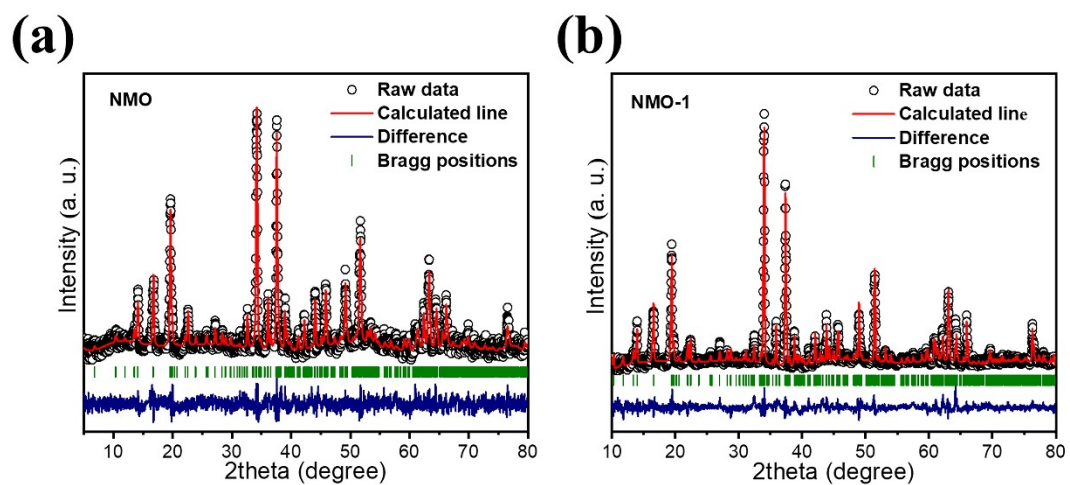

**Figure S3:** (a) Rietveld refinement of the NMO, (b) and NMO-1.

| Samples | a, Å    | b, Å     | c, Å    | V, Å <sup>3</sup> | Rwp, % | Rp, % |
|---------|---------|----------|---------|-------------------|--------|-------|
| NMO     | 9.09440 | 26.38520 | 2.82563 | 676.2             | 3.55   | 2.8   |
| NMO-1   | 9.11232 | 26.39303 | 2.83030 | 680.6             | 1.13   | 0.82  |

**Table S1:** The lattice parameters of T-type phases obtained from Rietveld refinement of NMO, NMO-1 samples.

| Space group: Pbam |        |        |        |         |           |
|-------------------|--------|--------|--------|---------|-----------|
| atom              | x      | y      | z      | Wyckoff | Occupancy |
| Na1               | 0.1674 | 0.2231 | 0.0000 | 4g      | 1         |
| Na2               | 0.1895 | 0.4183 | 0.5000 | 4h      | 1         |
| Na3               | 0.1477 | 0.0185 | 0.0000 | 4g      | 1         |
| Mn1               | 0.0312 | 0.3061 | 0.0000 | 4g      | 1         |
| Mn2               | 0.3541 | 0.0894 | 0.5000 | 4h      | 1         |
| Mn3               | 0.0000 | 0.5000 | 0.0000 | 2c      | 1         |
| Mn4               | 0.3766 | 0.3063 | 0.5000 | 4h      | 1         |
| Mn5               | 0.0296 | 0.1139 | 0.0000 | 4g      | 1         |
| O1                | 0.3471 | 0.0040 | 0.5000 | 4h      | 1         |
| O2                | 0.1711 | 0.0657 | 0.0000 | 4g      | 1         |
| O3                | 0.0041 | 0.1518 | 0.5000 | 4h      | 1         |
| O4                | 0.4572 | 0.1925 | 0.5000 | 4h      | 1         |
| O5                | 0.2357 | 0.2780 | 0.5000 | 4h      | 1         |
| O6                | 0.2635 | 0.3539 | 0.0000 | 4g      | 1         |
| O7                | 0.2773 | 0.4018 | 0.0000 | 4g      | 1         |
| O8                | 0.5048 | 0.0674 | 0.0000 | 4g      | 1         |
| O9                | 0.4946 | 0.4467 | 0.5000 | 4h      | 1         |

**Table S2:** Crystallographic parameters of  $\text{Na}_{0.44}\text{MnO}_2$  refined by Rietveld method.

| Space group: Pbam |        |        |        |         |           |
|-------------------|--------|--------|--------|---------|-----------|
| atom              | x      | y      | z      | Wyckoff | Occupancy |
| Na1               | 0.2024 | 0.1997 | 0.0000 | 4g      | 1         |
| Na2               | 0.2033 | 0.4021 | 0.5000 | 4h      | 1         |
| Na3               | 0.1644 | 0.0246 | 0.0000 | 4g      | 1         |
| Mn1               | 0.0357 | 0.3067 | 0.0000 | 4g      | 0.999     |
| Mn2               | 0.3565 | 0.0920 | 0.5000 | 4h      | 0.990     |
| Mn3               | 0.0000 | 0.5000 | 0.0000 | 2c      | 0.997     |
| Mn4               | 0.3694 | 0.3033 | 0.5000 | 4h      | 0.994     |
| Mn5               | 0.0104 | 0.1107 | 0.0000 | 4g      | 0.990     |
| O1                | 0.3311 | 0.0015 | 0.5000 | 4h      | 1         |
| O2                | 0.2424 | 0.1062 | 0.0000 | 4g      | 1         |
| O3                | 0.1000 | 0.1810 | 0.5000 | 4h      | 1         |
| O4                | 0.4350 | 0.1843 | 0.5000 | 4h      | 1         |
| O5                | 0.1436 | 0.2882 | 0.5000 | 4h      | 1         |
| O6                | 0.2949 | 0.2442 | 0.0000 | 4g      | 1         |
| O7                | 0.3394 | 0.3638 | 0.0000 | 4g      | 1         |
| O8                | 0.5324 | 0.0748 | 0.0000 | 4g      | 1         |
| O9                | 0.5038 | 0.4442 | 0.5000 | 4h      | 1         |
| Al2               | 0.3565 | 0.0920 | 0.0000 | 4h      | 0.006     |
| Al5               | 0.0104 | 0.1107 | 0.0000 | 4g      | 0.004     |
| Ti1               | 0.0357 | 0.3067 | 0.0000 | 4g      | 0.001     |
| Ti3               | 0.000  | 0.5000 | 0.0000 | 2c      | 0.003     |
| Ti4               | 0.3694 | 0.3633 | 0.5000 | 4h      | 0.006     |
| Co2               | 0.3565 | 0.0920 | 0.5000 | 4g      | 0.004     |
| Co5               | 0.0104 | 0.1107 | 0.0000 | 4g      | 0.006     |

**Table S3:** Crystallographic parameters of NMO-1 refined by Rietveld method.



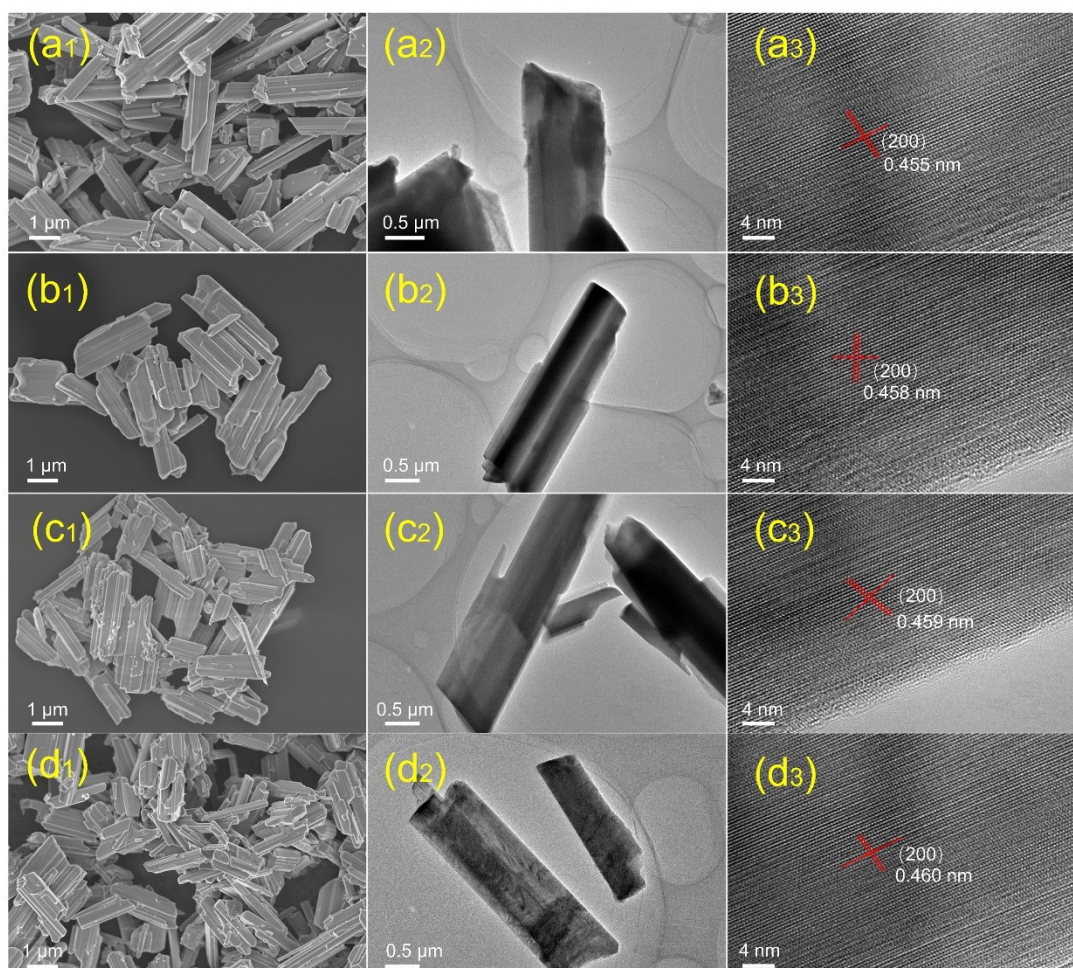

**Figure S4:** (a<sub>1</sub>, a<sub>2</sub>, a<sub>3</sub>), SEM, TEM and HR-TEM images of NMO, (b<sub>1</sub>, b<sub>2</sub>, b<sub>3</sub>) NMO-1, (c<sub>1</sub>, c<sub>2</sub>, c<sub>3</sub>) NMO-2, (d<sub>1</sub>, d<sub>2</sub>, d<sub>3</sub>) and NMO-3.

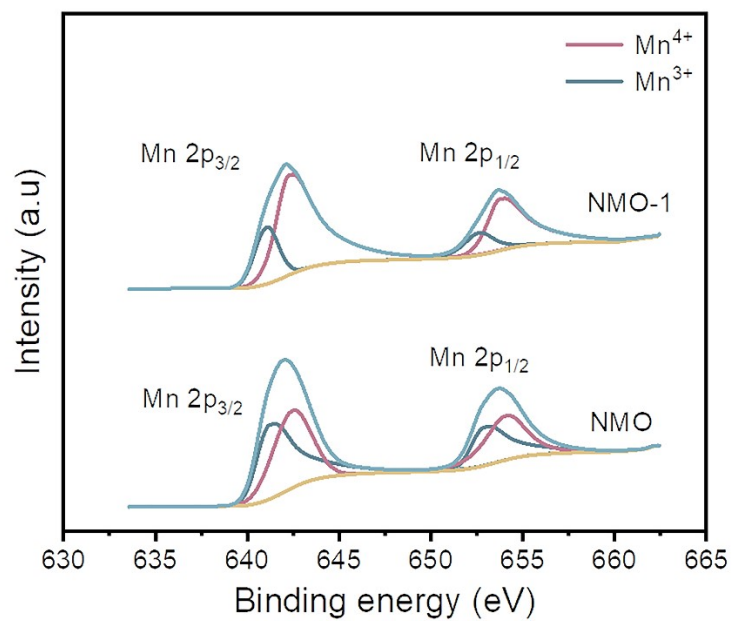

**Figure S5:** XPS patterns of Mn 2p in NMO and NMO-1 samples, respectively.

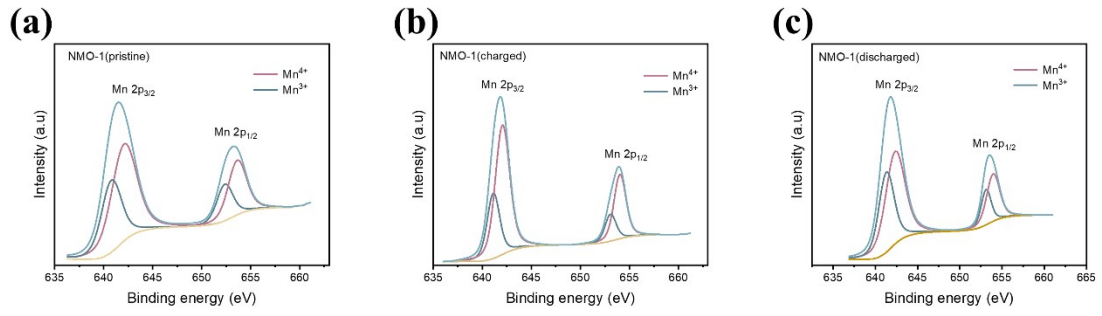

**Figure S6:** Ex situ XPS spectra of NMO-1 during initial charge and discharge at a current rate of 0.1 C between 2.0 and 4.0 V voltage range.

| Samples    | Na    | Mn    |
|------------|-------|-------|
| charged    | 0.202 | 0.997 |
| discharged | 0.682 | 0.997 |

**Table S4:** The atomic ratios of Na/Mn the fully charged NMO-1 and discharged sample determined by ICP-OES (regard M=1).

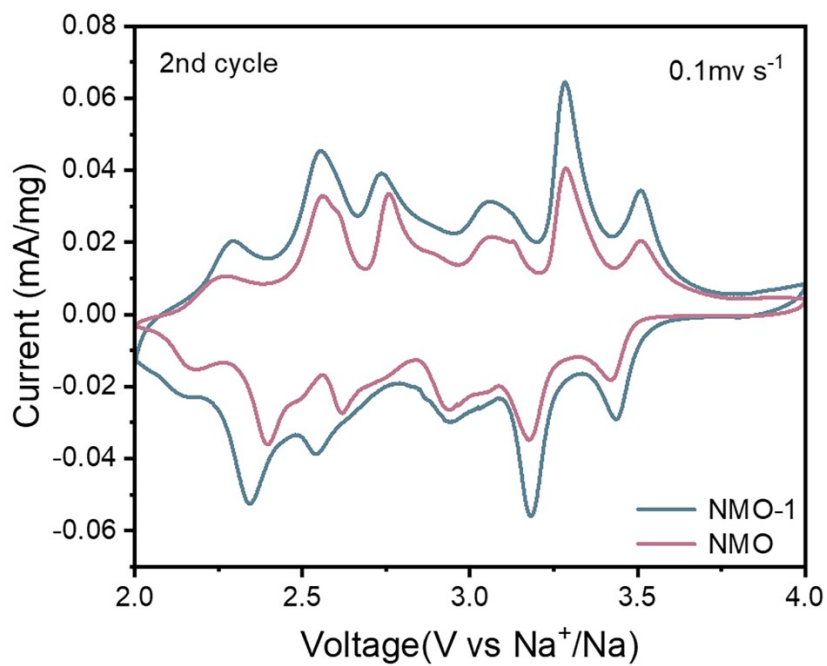

**Figure S7:** The 2nd cycle CV curves of NMO and NMO-1 at 0.1 mV s<sup>-1</sup>.

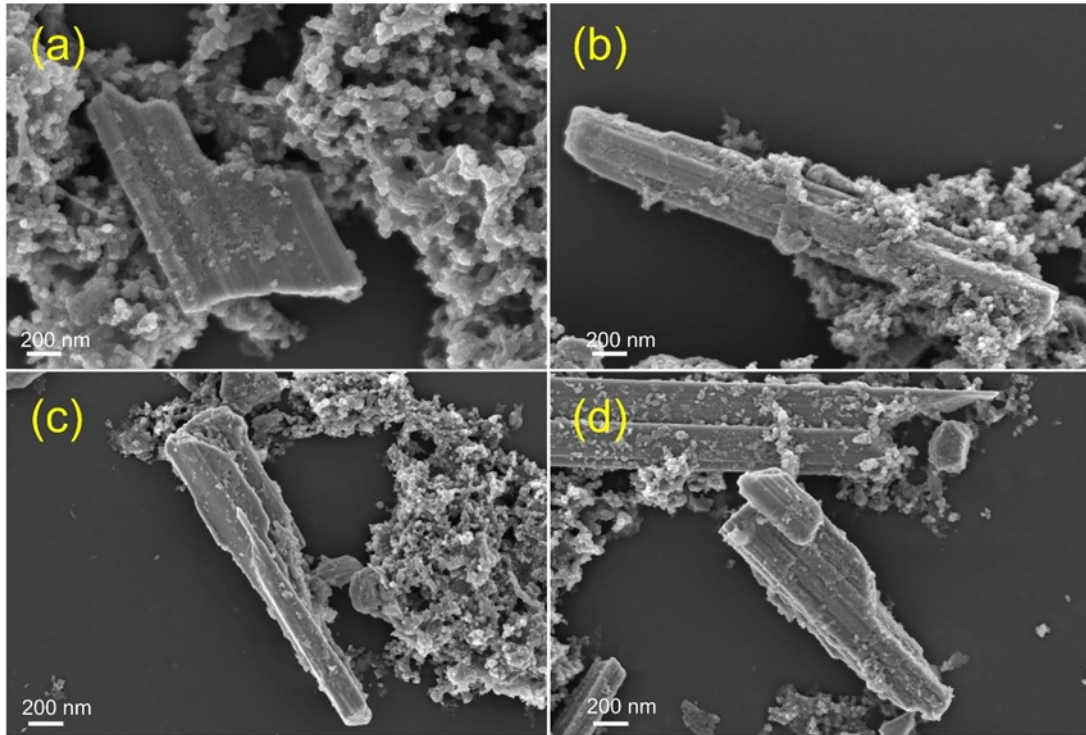

**Figure S8:** (a) SEM images of NMO, (b) NMO-1, (c) NMO-2, (d) and NMO-3 after 2000 cycles at the current rate of 10 C.

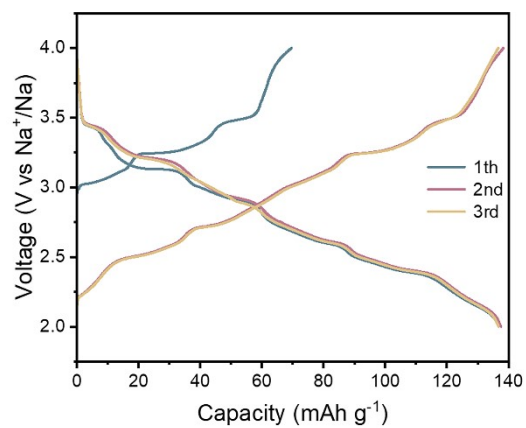

**Figure S9:** The charge-discharge profile of initial three cycles of NMO-1 electrode at 0.1 C.

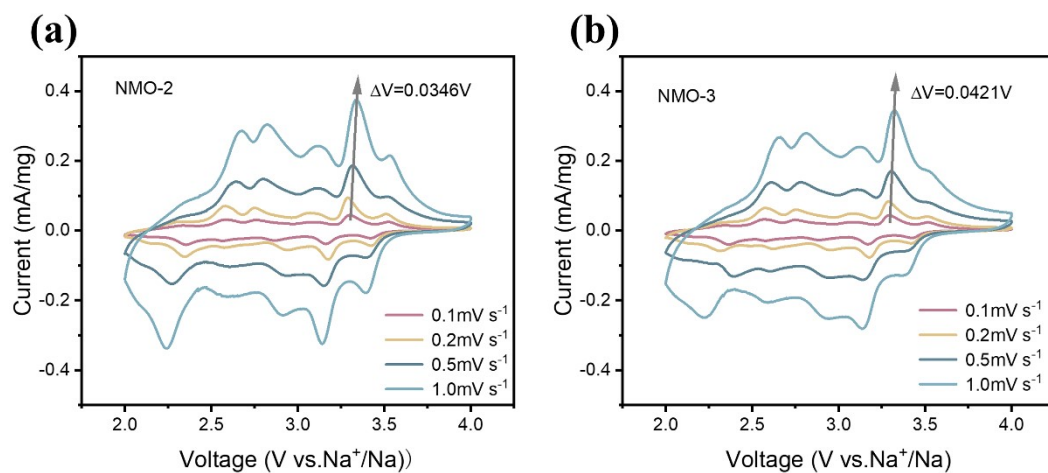

**Figure S10:** (a) CV curves of the NMO-2, (b) and NMO-3 at the different scanning rates increasing from 0.1 to 1.0  $\text{mV s}^{-1}$ .



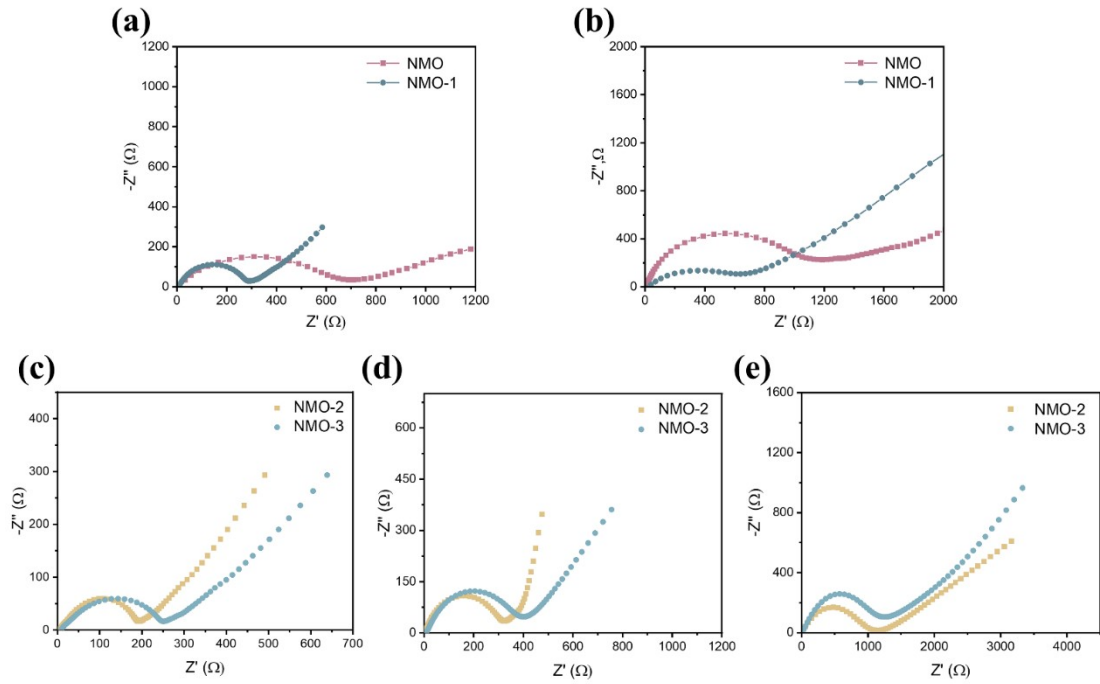

**Figure S11:** (a) Nyquist plot of NMO and NMO-1 after 100 cycles at 10C, (b) and Nyquist plot of NMO and NMO-1 after 1000 cycles at 10C. (c) Nyquist plots of NMO-2 and NMO-3 before cycling, (d) and nyquist plot of NMO-2 and NMO-3 after 100 cycles at 10C. (e) Nyquist plot of NMO-2 and NMO-3 after 1000 cycles at 10C.

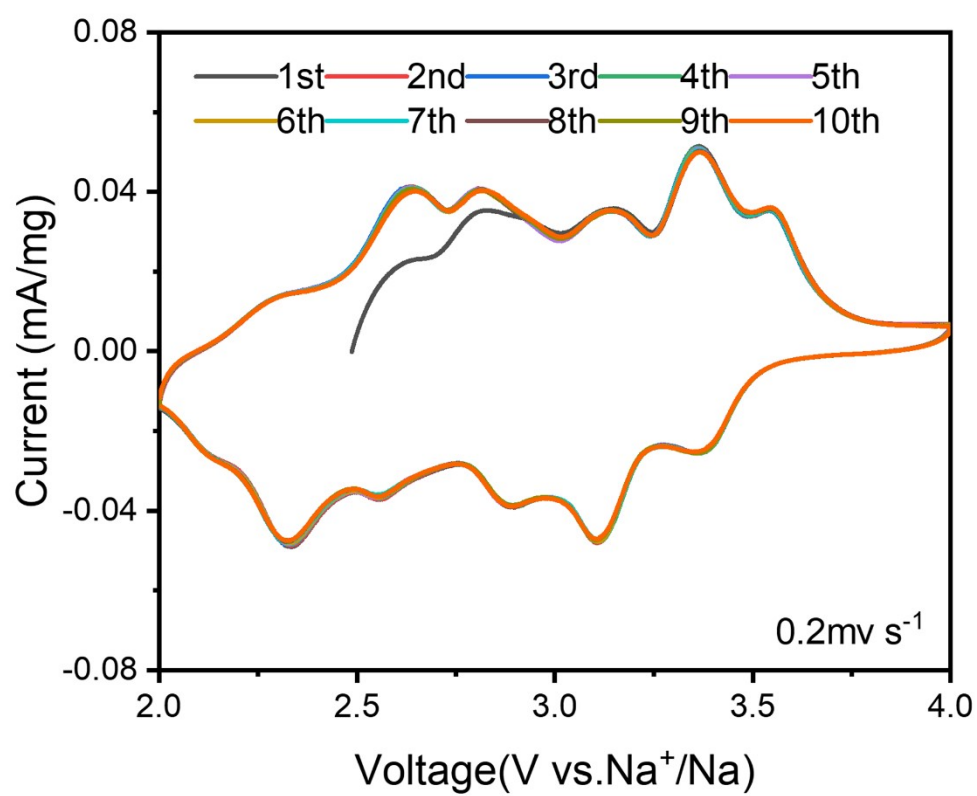

**Figure S12:** CV curves of NMO-1 at a scan rate of 0.2 mV s<sup>-1</sup>.

| Samples | Before cycling |               | After 100 cycles |               | After 1000 cycles |               |
|---------|----------------|---------------|------------------|---------------|-------------------|---------------|
|         | Rs, $\Omega$   | Rct, $\Omega$ | Rs, $\Omega$     | Rct, $\Omega$ | Rs, $\Omega$      | Rct, $\Omega$ |
| NMO     | 5.912          | 464.9         | 6.424            | 782.4         | 12.396            | 1264,9        |
| NMO-1   | 4.632          | 157.8         | 5.301            | 274.8         | 6.132             | 701.8         |
| NMO-2   | 4.783          | 193.4         | 5.678            | 315.6         | 10.565            | 1116.4        |
| NMO-3   | 4.921          | 247.1         | 5.902            | 400.8         | 11.382            | 1235.7        |

**Table S5:** Impedance parameters derived using equivalent circuit model for NMO, NMO-1, NMO-2 and NMO-3 before cycling and after cycling.

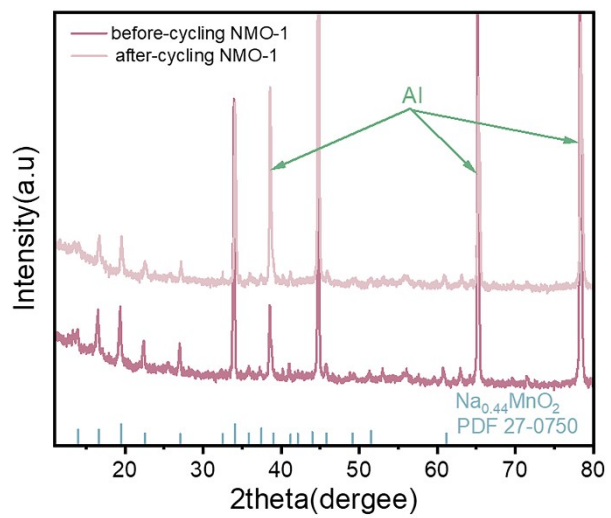

**Figure S13:** The XRD patterns of NMO-1 before and after cycling.

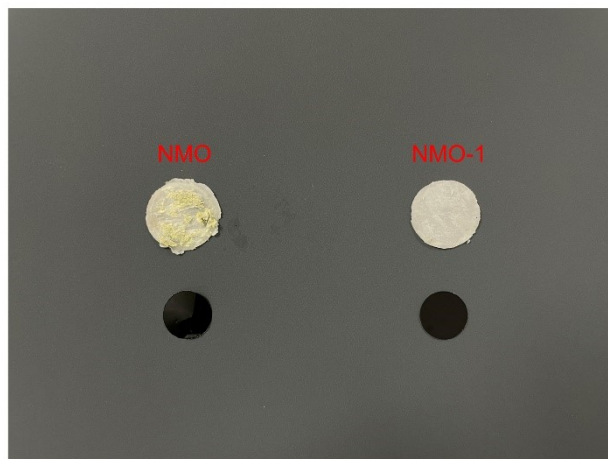

**Figure S14:** The picture of diaphragms and pole pieces after 1000 cycles for pristine NMO and NMO-1.

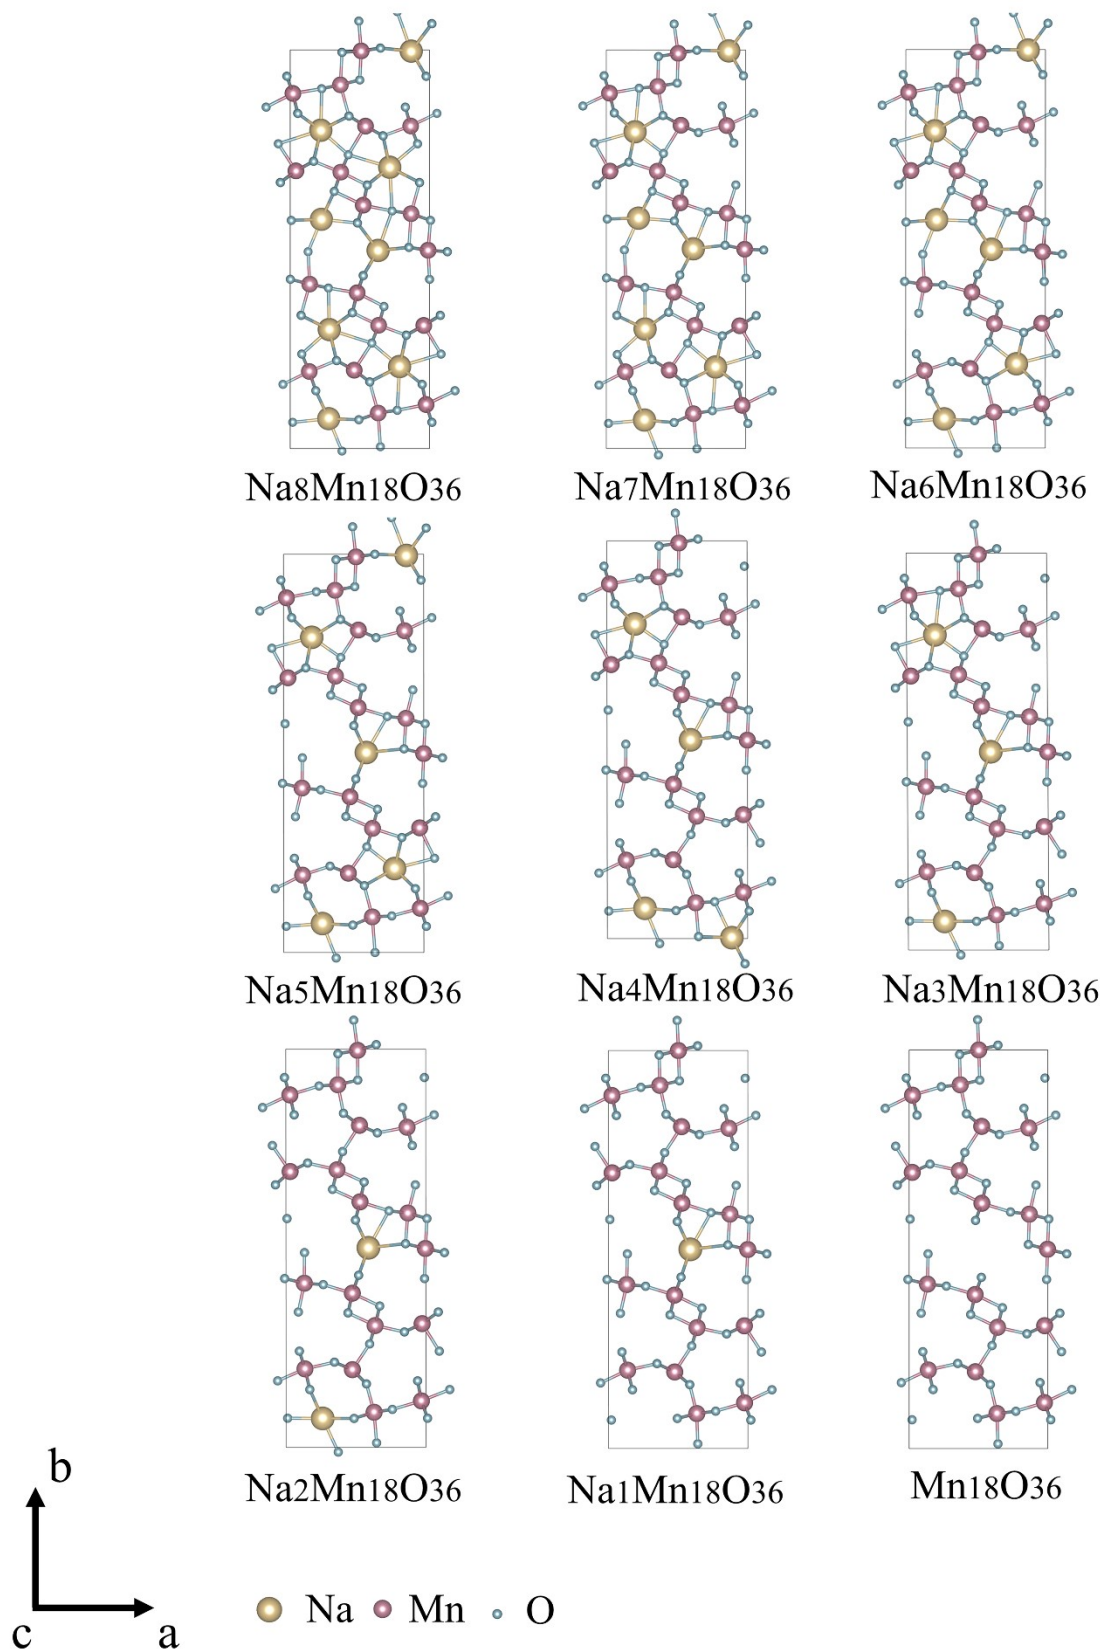

**Figure S15:**  $\text{Na}_8\text{Mn}_{18}\text{O}_{36}$  Structure Evolution Diagram of  $\text{Na}^+$  intercalation and extraction.

|                                                  | <b>a (Å)</b> | <b>b (Å)</b> | <b>c (Å)</b> | <b>Volume (Å<sup>3</sup>)</b> |
|--------------------------------------------------|--------------|--------------|--------------|-------------------------------|
| Na <sub>8</sub> Mn <sub>18</sub> O <sub>36</sub> | 9.22585      | 26.36779     | 2.91262      | 708.539925                    |
| Na <sub>7</sub> Mn <sub>18</sub> O <sub>36</sub> | 9.18141      | 26.20375     | 2.91181      | 700.544852                    |
| Na <sub>6</sub> Mn <sub>18</sub> O <sub>36</sub> | 9.14358      | 26.03411     | 2.90665      | 691.913242                    |
| Na <sub>5</sub> Mn <sub>18</sub> O <sub>36</sub> | 9.12525      | 25.94757     | 2.90438      | 687.694691                    |
| Na <sub>4</sub> Mn <sub>18</sub> O <sub>36</sub> | 9.10057      | 25.75171     | 2.90677      | 681.215968                    |
| Na <sub>3</sub> Mn <sub>18</sub> O <sub>36</sub> | 9.08100      | 25.67574     | 2.90870      | 678.183335                    |
| Na <sub>2</sub> Mn <sub>18</sub> O <sub>36</sub> | 9.02618      | 25.70514     | 2.90858      | 674.845777                    |
| Na <sub>1</sub> Mn <sub>18</sub> O <sub>36</sub> | 8.97875      | 25.64249     | 2.90839      | 669.523713                    |
| Mn <sub>18</sub> O <sub>36</sub>                 | 8.95734      | 25.67677     | 2.90839      | 668.918203                    |

**Table S6:** The shifting lattice parameters of Na<sub>0.44</sub>MnO<sub>2</sub> obtained from DFT.

| Elements | NMO    | NMO-1  | NMO-2  | NMO-3  |
|----------|--------|--------|--------|--------|
| Na       | 0.4394 | 0.4402 | 0.4412 | 0.4408 |
| Mn       | 1.0000 | 0.9703 | 0.9412 | 0.9109 |
| Al       | -      | 0.0101 | 0.0197 | 0.0302 |
| Ti       | -      | 0.0100 | 0.0203 | 0.0304 |
| Co       | -      | 0.0102 | 0.0210 | 0.0303 |

**Table S7:** The atomic ratios of Na/M (M = Mn, Al, Ti, Co) in NMO, NMO-1, NMO-2 And NMO-3 samples determined by ICP-OES (regard M=1).



| Material                                                           | method                      | Electrochemical performance                           | reference |
|--------------------------------------------------------------------|-----------------------------|-------------------------------------------------------|-----------|
| $\text{Na}_{0.44}\text{MnO}_2$                                     | PVP-assisted gel combustion | 0.1C (122mAh g <sup>-1</sup> )<br>82.9%(700th at 10C) | [20]      |
| $\text{Na}_{0.44}\text{MnO}_{1.93}\text{F}_{0.07}$                 | an oxalate precursor        | 5C (102mAh g <sup>-1</sup> )<br>79% (400th at 5C)     | [27]      |
| $\text{Na}_{0.44}\text{Mn}_{0.98}\text{Zr}_{0.02}\text{O}_2$       | an oxalate precursor        | 5C(100mAh g <sup>-1</sup> )<br>80%(1000th at 5C)      | [S1]      |
| $\text{Na}_{0.44}\text{Mn}_{0.95}\text{Mg}_{0.05}\text{O}_2$       | solid-state reaction        | 30C(60mAh g <sup>-1</sup> )<br>72%(800th at 5C)       | [S2]      |
| $\text{Na}_{0.44}\text{Mn}_{0.9925}\text{Co}_{0.0075}\text{O}_2$   | solid-state reaction        | 10C (93mAh g <sup>-1</sup> )<br>85.2% (500th at 10C)  | [29]      |
| $\text{Na}_{0.44}\text{MnO}_2@\text{In}_2\text{O}_3$               | solid-state reaction        | 10C(63.6mAh g <sup>-1</sup> )<br>86.7%(400th at 1C)   | [S3]      |
| $\text{Na}_{0.44}\text{MnO}_2@\text{Al}_2\text{O}_3$               | solid-state reaction        | 8C(97.1mAh g <sup>-1</sup> )<br>96%(200th at 0.2C )   | [S4]      |
| $\text{Na}_{0.44}\text{MnO}_2$                                     | electrospin and anneal      | 10C(69.5mAh g <sup>-1</sup> )<br>47%(150th at 1C)     | [S5]      |
| $\text{Na}_{0.44}\text{MnO}_2$                                     | Microemulsion               | 8.3C(103mAh g <sup>-1</sup> )<br>88%(20th at 8.3C)    | [S6]      |
| $\text{Na}_{0.44}\text{Mn}_{0.97}(\text{AlTiCo})_{0.01}\text{O}_2$ | solid-state reaction        | 20C(80mAh g <sup>-1</sup> )<br>80%(2000th at 10C)     | This work |

**Table S8:** The electrochemical characteristics of several T-type  $\text{Na}_{0.44}\text{MnO}_2$  cathode materials were compared.

## REFERENCES

1. W. J. Shi, Y. M. Zheng, X. M. Meng, S. B. Liu, S. D. Xu, L. Chen, X. M. Wang and D. Zhang, Designing Sodium Manganese Oxide with 4 d-Cation Zr Doping as a High-Rate-Performance Cathode for Sodium-Ion Batteries, *ChemElectroChem*, 2020, **7**, 2545-2552.
2. X. L. Li, J. Bao, Y. F. Li, D. Chen, C. Ma, Q. Q. Qiu, X. Y. Yue, Q. C. Wang and Y. N. Zhou, Boosting Reversibility of Mn-Based Tunnel-Structured Cathode Materials for Sodium-Ion Batteries by Magnesium Substitution, *Adv. Sci. (Weinh)*, 2021, **8**, 2004448.
3. W. Liu, Q. Ren, M. Yang, L. Liu, Y. Zhang, D. Su, J. Wen, Q. Wang, X. Wang and Y. Feng, Na<sub>0.44</sub>MnO<sub>2</sub> coated with In<sub>2</sub>O<sub>3</sub> as a high-voltage cathode for sodium-ion batteries, *J. Alloy. Compd.*, 2022, **896**.
4. Y. Zhang, L. Liu, S. Jamil, J. Xie, W. Liu, J. Xia, S. Nie and X. Wang, Al<sub>2</sub>O<sub>3</sub> coated Na<sub>0.44</sub>MnO<sub>2</sub> as high-voltage cathode for sodium ion batteries, *Appl. Surf. Sci.*, 2019, **494**, 1156-1165.
5. B. Fu, X. Zhou and Y. Wang, High-rate performance electrospun Na<sub>0.44</sub>MnO<sub>2</sub> nanofibers as cathode material for sodium-ion batteries, *J. Power Sources*, 2016, **310**, 102-108.
6. E. Hosono, T. Saito, J. Hoshino, M. Okubo, Y. Saito, D. Nishio-Hamane, T. Kudo and H. Zhou, High power Na-ion rechargeable battery with single-crystalline Na<sub>0.44</sub>MnO<sub>2</sub> nanowire electrode, *J. Power Sources*, 2012, **217**, 43-46.
